# Supplementary material for: Selection for Reducing Energy Cost of Protein Production Drives the GC Content and Amino Acid Composition Bias in Gene Transfer Agents
Source: PubMed Central journal article supplement (PMC7360931; doi:10.1128/mbio.01206-20), 2020-07-14
Supplement: mBio.01206-20-sf003.pdf [file mBio.01206-20-sf003.pdf]

Carbon content  
 2.48  
 2.55  
 2.62  
 2.69  
 2.76  
 2.83  
 2.90  
 2.97  
 3.04  
 3.12  
 3.19  
 GC1 Content  
 40  
 43  
 46  
 49  
 52  
 55  
 58  
 61  
 65  
 68  
 71  
 GC2 Content  
 32  
 33  
 35  
 37  
 39  
 41  
 43  
 44  
 46  
 48  
 50

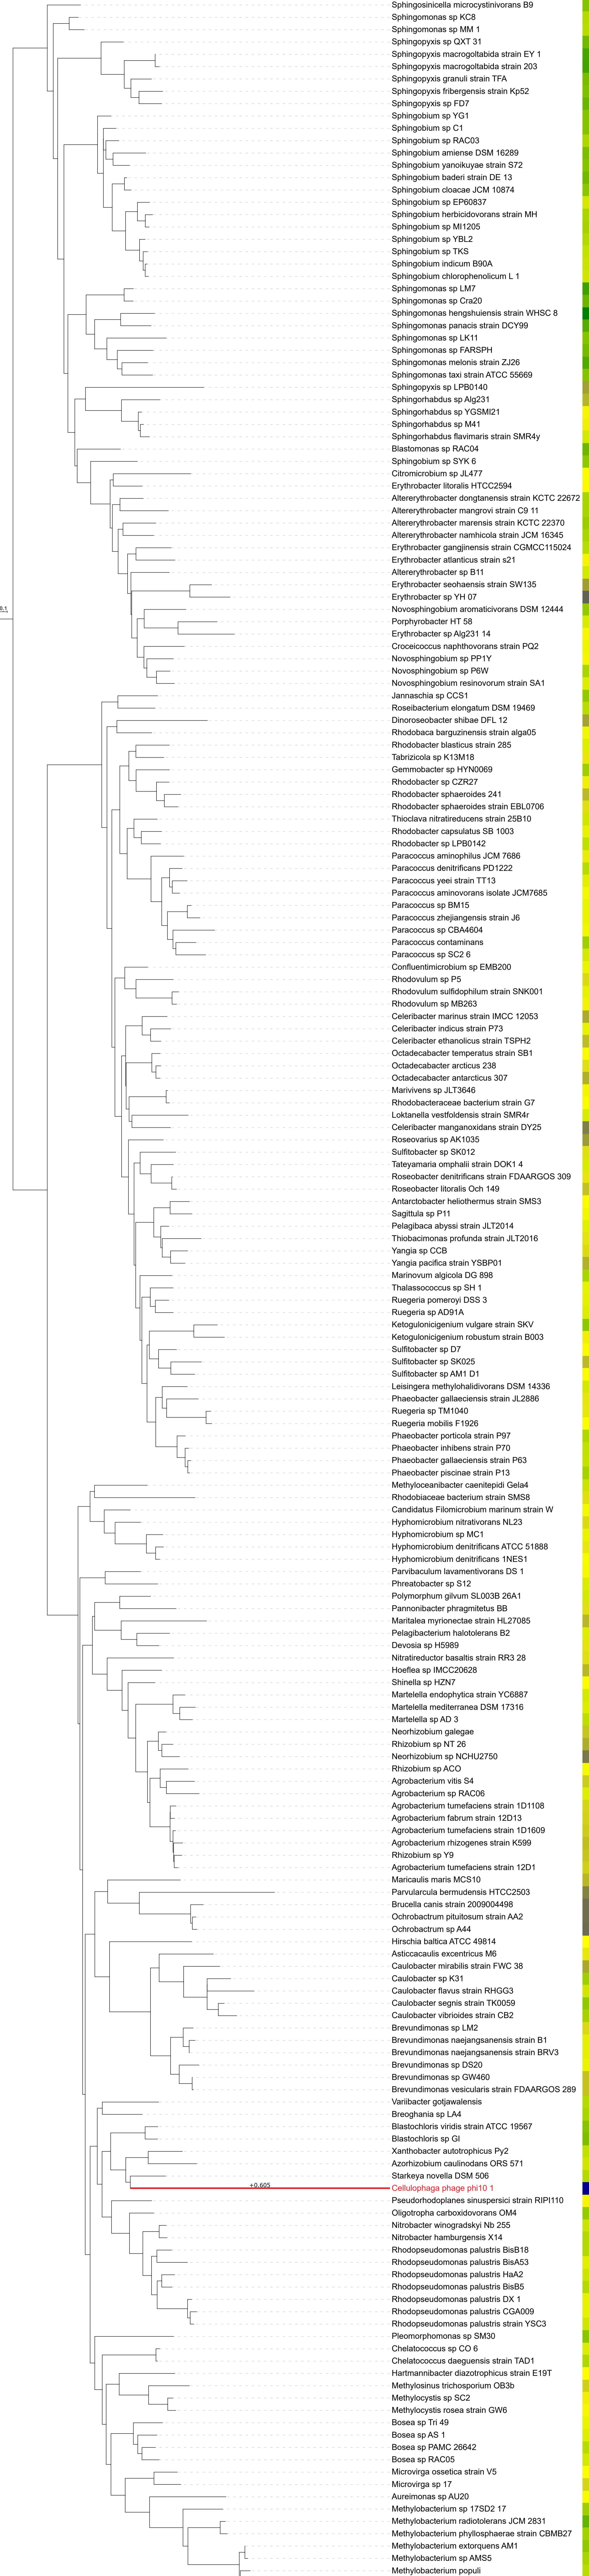

- Spingosinicella microcystinivorans B9
- Spingomonas sp KC8
- Spingomonas sp MM 1
- Spingopyxis sp QXT 31
- Spingopyxis macrogoltabida strain EY 1
- Spingopyxis macrogoltabida strain 203
- Spingopyxis granulii strain TFA
- Spingopyxis fribergensis strain Kp52
- Spingopyxis sp FD7
- Spingobium sp YG1
- Spingobium sp C1
- Spingobium sp RAC03
- Spingobium amiense DSM 16289
- Spingobium yanoikuyae strain S72
- Spingobium baderi strain DE 13
- Spingobium cloacae JCM 10874
- Spingobium sp EP60837
- Spingobium herbicidovorans strain MH
- Spingobium sp MI1205
- Spingobium sp YBL2
- Spingobium sp TKS
- Spingobium indicum B90A
- Spingobium chlorophenicum L 1
- Spingomonas sp LM7
- Spingomonas sp Cra20
- Spingomonas hengshuiensis strain WHSC 8
- Spingomonas panacis strain DCY99
- Spingomonas sp LK11
- Spingomonas sp FARSPH
- Spingomonas melonis strain ZJ26
- Spingomonas taxi strain ATCC 55669
- Spingopyxis sp LPB0140
- Spingorhabdus sp Alg231
- Spingorhabdus sp YGSMI21
- Spingorhabdus sp M41
- Spingorhabdus flavimaris strain SMR4y
- Blastomonas sp RAC04
- Spingobium sp SYK 6
- Citromicrobium sp JL477
- Erythrobacter litoralis HTCC2594
- Altererythrobacter dongtanensis strain KCTC 22672
- Altererythrobacter mangrovi strain C9 11
- Altererythrobacter marensis strain KCTC 22370
- Altererythrobacter namhicola strain JCM 16345
- Erythrobacter gangjinensis strain CGMCC115024
- Erythrobacter atlanticus strain s21
- Altererythrobacter sp B11
- Erythrobacter seohaensis strain SW135
- Erythrobacter sp YH 07
- Novospingobium aromaticivorans DSM 12444
- Porphyrobacter HT 58
- Erythrobacter sp Alg231 14
- Croceiococcus naphthovorans strain PQ2
- Novospingobium sp PP1Y
- Novospingobium sp P6W
- Novospingobium resinovorum strain SA1
- Jannaschia sp CCS1
- Roseibacterium elongatum DSM 19469
- Dinoroseobacter shibae DFL 12
- Rhodobaca barguzinensis strain alga05
- Rhodobacter blasticus strain 285
- Tabrizicola sp K13M18
- Gemmobacter sp HYN0069
- Rhodobacter sp CZR27
- Rhodobacter sphaeroides 241
- Rhodobacter sphaeroides strain EBL0706
- Thioclava nitratireducens strain 25B10
- Rhodobacter capsulatus SB 1003
- Rhodobacter sp LPB0142
- Paracoccus aminophilus JCM 7686
- Paracoccus denitrificans PD1222
- Paracoccus yeeli strain TT13
- Paracoccus aminovorans isolate JCM7685
- Paracoccus sp BM15
- Paracoccus zhejiangensis strain J6
- Paracoccus sp CBA4604
- Paracoccus contaminans
- Paracoccus sp SC2 6
- Confluentimicrobium sp EMB200
- Rhodovulum sp P5
- Rhodovulum sulfidophilum strain SNK001
- Rhodovulum sp MB263
- Celeribacter marinus strain IMCC 12053
- Celeribacter indicus strain P73
- Celeribacter ethanolicus strain TSPH2
- Octadecabacter temperatus strain SB1
- Octadecabacter arcticus 238
- Octadecabacter antarcticus 307
- Marivivens sp JLT3646
- Rhodobacteraceae bacterium strain G7
- Loktanella vestfoldensis strain SMR4r
- Celeribacter manganoxidans strain DY25
- Roseovarius sp AK1035
- Sulfitobacter sp SK012
- Tateyamaia omphalii strain DOK1 4
- Roseobacter denitrificans strain FDAARGOS 309
- Roseobacter litoralis Och 149
- Antarctobacter heliothermus strain SMS3
- Sagittula sp P11
- Pelagibaca abyssii strain JLT2014
- Thiobacimonas profunda strain JLT2016
- Yangia sp CCB
- Yangia pacifica strain YSBP01
- Marinovum algicola DG 898
- Thalassococcus sp SH 1
- Ruegeria pomeroyi DSS 3
- Ruegeria sp AD91A
- Ketogulonicigenium vulgare strain SKV
- Ketogulonicigenium robustum strain B003
- Sulfitobacter sp D7
- Sulfitobacter sp SK025
- Sulfitobacter sp AM1 D1
- Leisingera methylohalidivorans DSM 14336
- Phaeobacter gallaeciensis strain JL2886
- Ruegeria sp TM1040
- Ruegeria mobilis F1926
- Phaeobacter porticola strain P97
- Phaeobacter inhibens strain P70
- Phaeobacter gallaeciensis strain P63
- Phaeobacter piscinae strain P13
- Methyloceanibacter caenitepidi Gela4
- Rhodobiaceae bacterium strain SMS8
- Candidatus Filomicrobium marinum strain W
- Hyphomicrobium nitrativorans NL23
- Hyphomicrobium sp MC1
- Hyphomicrobium denitrificans ATCC 51888
- Hyphomicrobium denitrificans 1NES1
- Parvibaculum lavamentivorans DS 1
- Phreatobacter sp S12
- Polymorphum gilvum SL003B 26A1
- Pannonibacter phragmitetus BB
- Maritalea myrionectae strain HL27085
- Pelagibacterium halotolerans B2
- Devosia sp H5989
- Nitratireductor basaltis strain RR3 28
- Hoeflea sp IMCC20628
- Shinella sp HZN7
- Martellella endophytica strain YC6887
- Martellella mediterranea DSM 17316
- Martellella sp AD 3
- Neorhizobium galegae
- Rhizobium sp NT 26
- Neorhizobium sp NCHU2750
- Rhizobium sp ACO
- Agrobacterium vitis S4
- Agrobacterium sp RAC06
- Agrobacterium tumefaciens strain 1D1108
- Agrobacterium fabrum strain 12D13
- Agrobacterium tumefaciens strain 1D1609
- Agrobacterium rhizogenes strain K599
- Rhizobium sp Y9
- Agrobacterium tumefaciens strain 12D1
- Maricaulis maris MCS10
- Parvularcula bermudensis HTCC2503
- Bruceella canis strain 2009004498
- Ochrobactrum pituitosum strain AA2
- Ochrobactrum sp A44
- Hirschia baltica ATCC 49814
- Asticcacaulis excentricus M6
- Caulobacter mirabilis strain FWC 38
- Caulobacter sp K31
- Caulobacter flavus strain RHGG3
- Caulobacter segnis strain TK0059
- Caulobacter vibrioides strain CB2
- Brevundimonas sp LM2
- Brevundimonas naejangsanensis strain B1
- Brevundimonas naejangsanensis strain BRV3
- Brevundimonas sp DS20
- Brevundimonas sp GW460
- Brevundimonas vesicularis strain FDAARGOS 289
- Variibacter gotjawalensis
- Breoghania sp LA4
- Blastochloris viridis strain ATCC 19567
- Blastochloris sp GI
- Xanthobacter autotrophicus Py2
- Azorhizobium caulinodans ORS 571
- Starkvea novella DSM 506
- Cellulophaga phage phi10 1
- Pseudorhodoplanes sinuspersici strain RIP110
- Oligotropha carboxidovorans OM4
- Nitrobacter winogradskyi N 255
- Nitrobacter hamburgensis X14
- Rhodopseudomonas palustris BisB18
- Rhodopseudomonas palustris BisA53
- Rhodopseudomonas palustris BisA2
- Rhodopseudomonas palustris BisB5
- Rhodopseudomonas palustris DX 1
- Rhodopseudomonas palustris CGA009
- Rhodopseudomonas palustris strain YSC3
- Pleomorphomonas sp SM30
- Chelatococcus sp CO 6
- Chelatococcus daeguensis strain TAD1
- Hartmannibacter diazotrophicus strain E19T
- Methylosinus trichosporium OB3b
- Methylocystis sp SC2
- Methylocystis rosea strain GW6
- Bosea sp Tri 49
- Bosea sp AS 1
- Bosea sp PAMC 26642
- Bosea sp RAC05
- Microvirga ossetica strain V5
- Microvirga sp 17
- Aureimonas sp AU20
- Methylobacterium sp 17SD2 17
- Methylobacterium radiotolerans JCM 2831
- Methylobacterium phyllosphaerae strain CBMB27
- Methylobacterium extorquens AM1
- Methylobacterium sp AMS5
- Methylobacterium populi
- Methylobacterium sp DM1

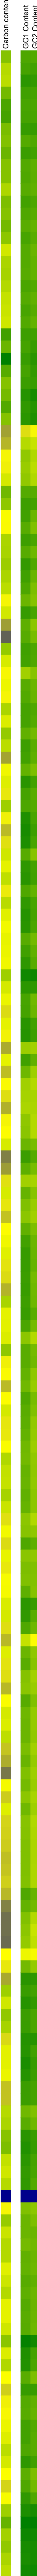

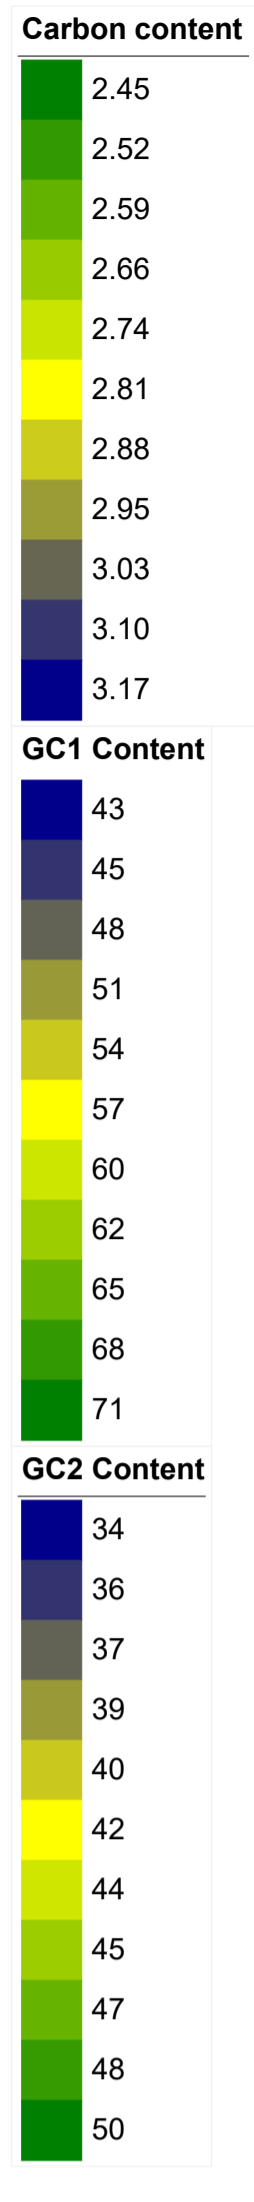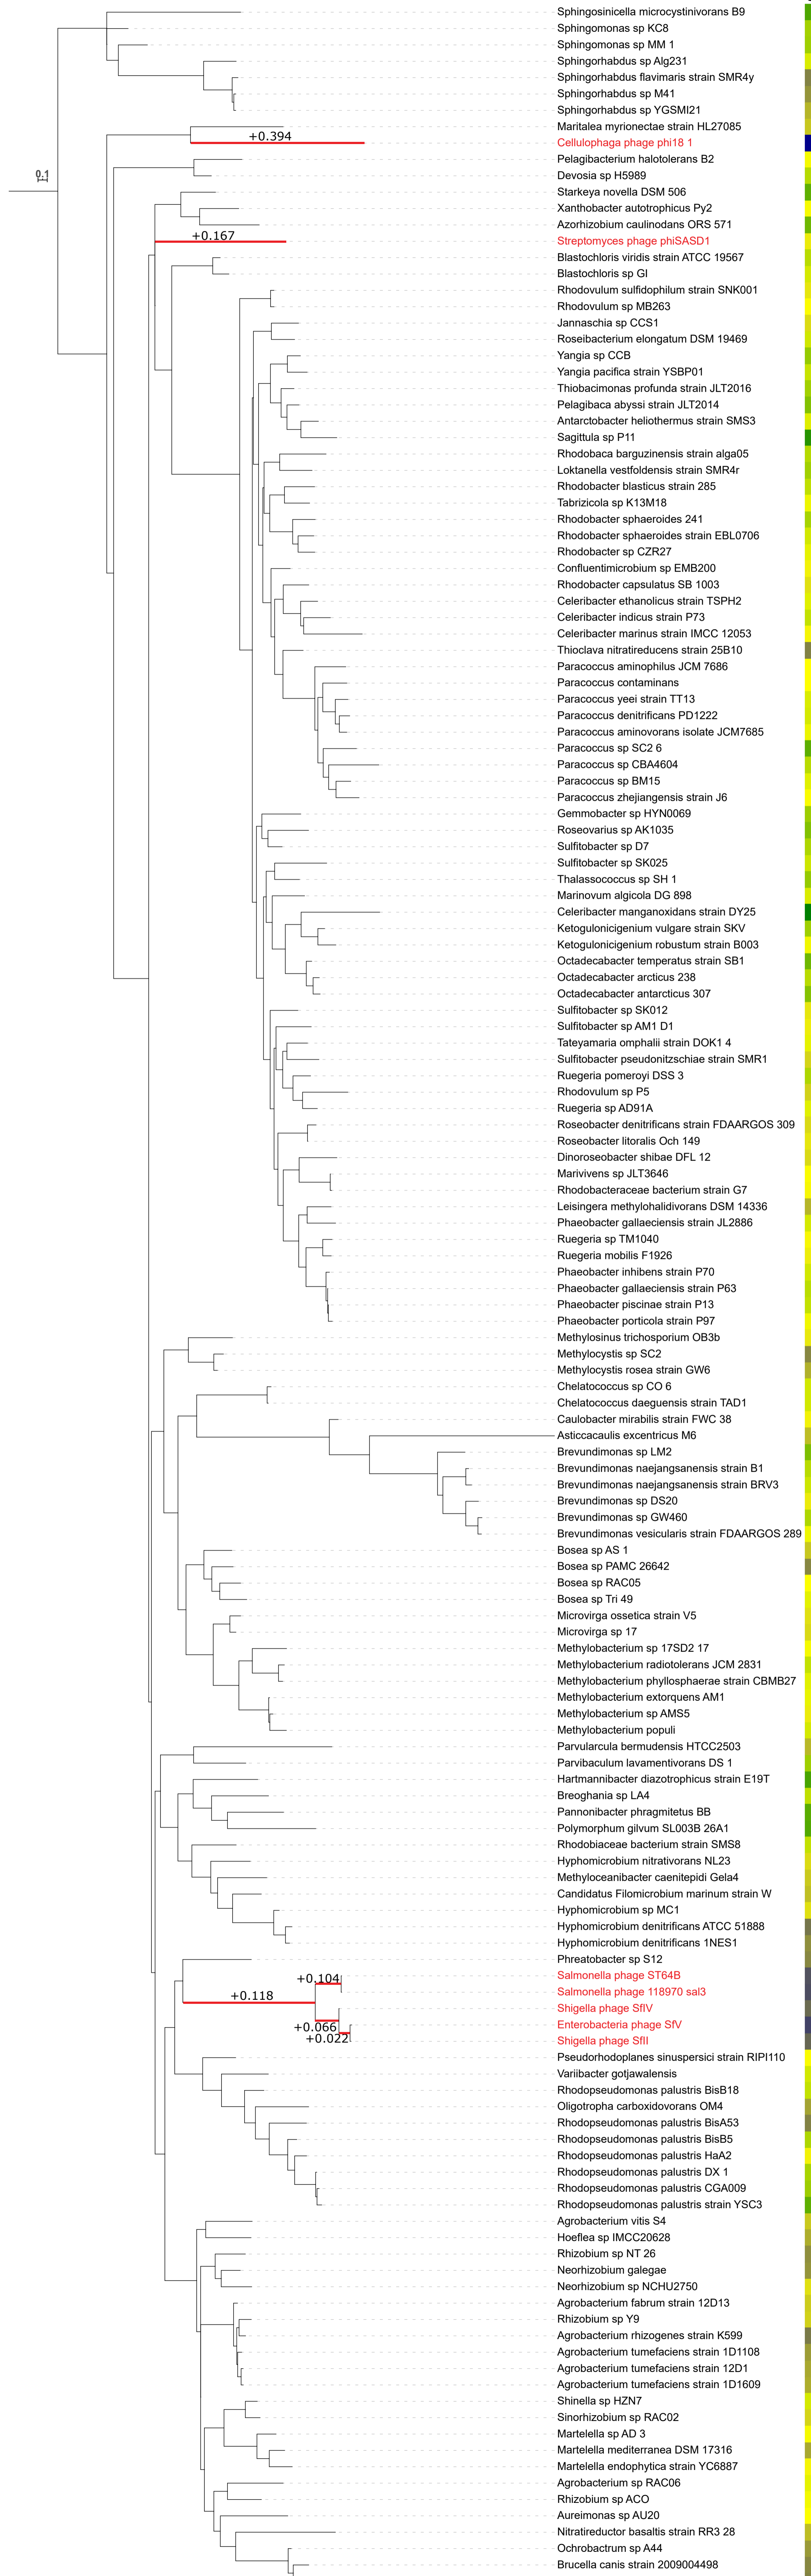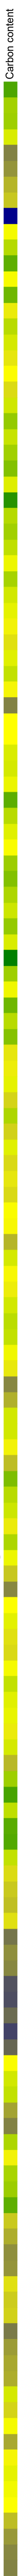

# g10

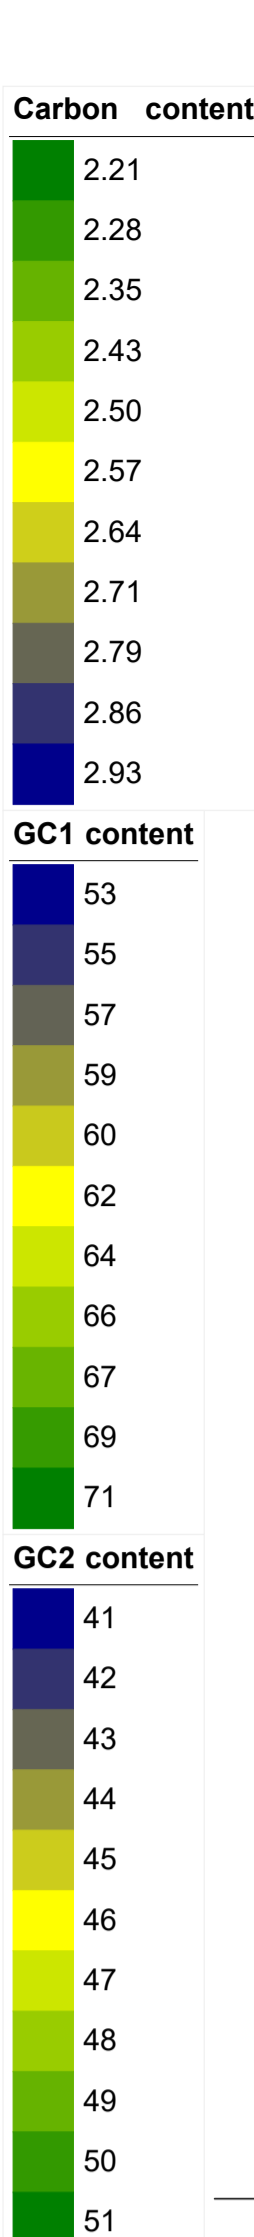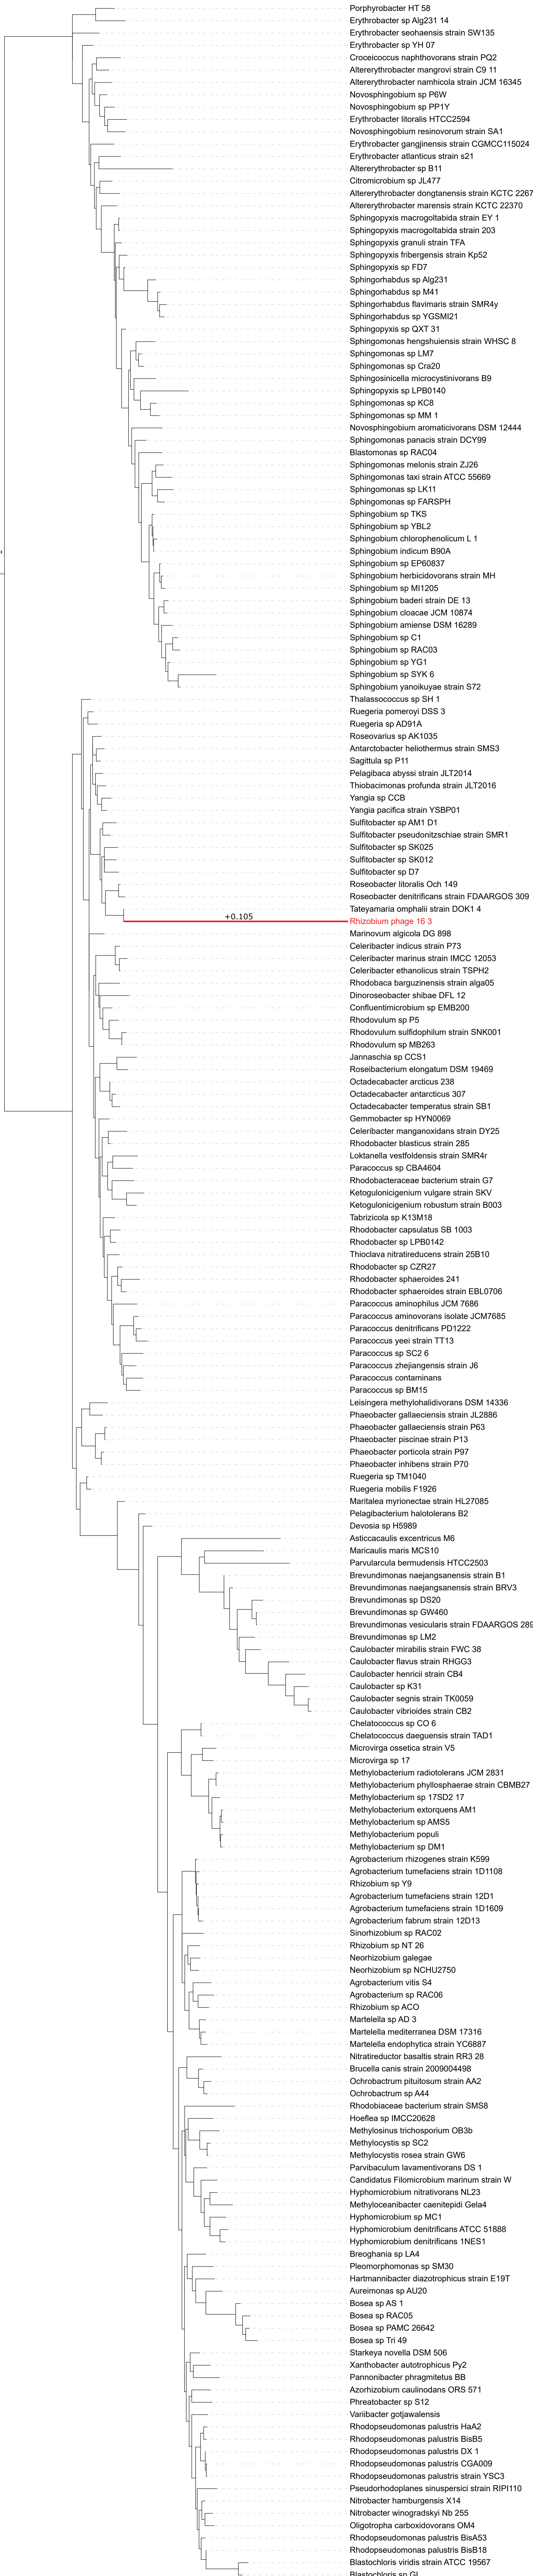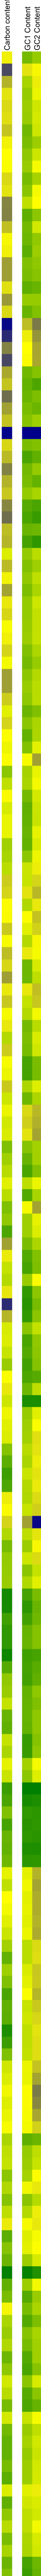

# g12

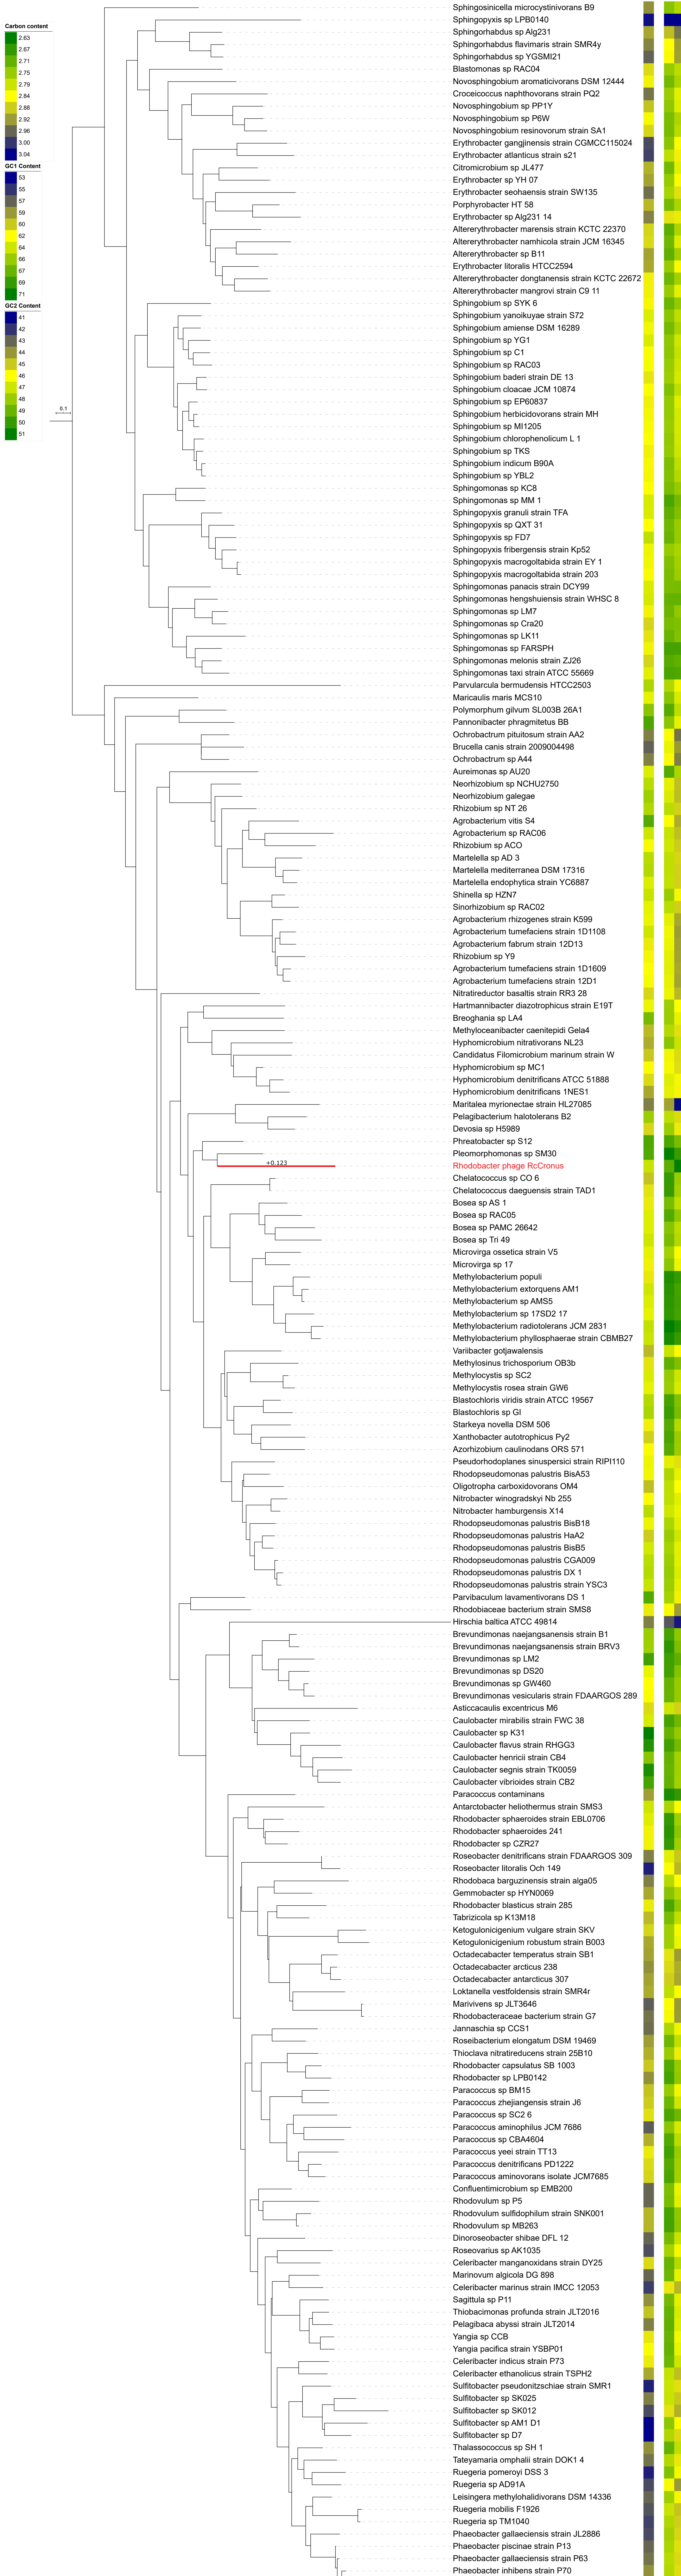

Carbon content

GC1 Content

GC2 Content

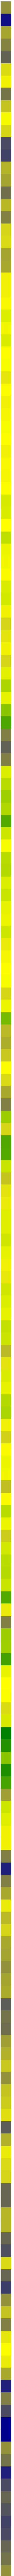

# g13

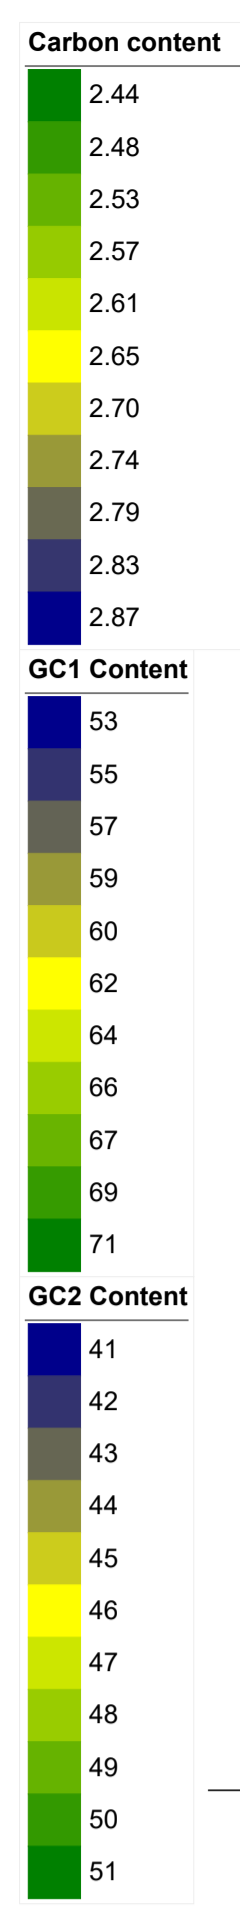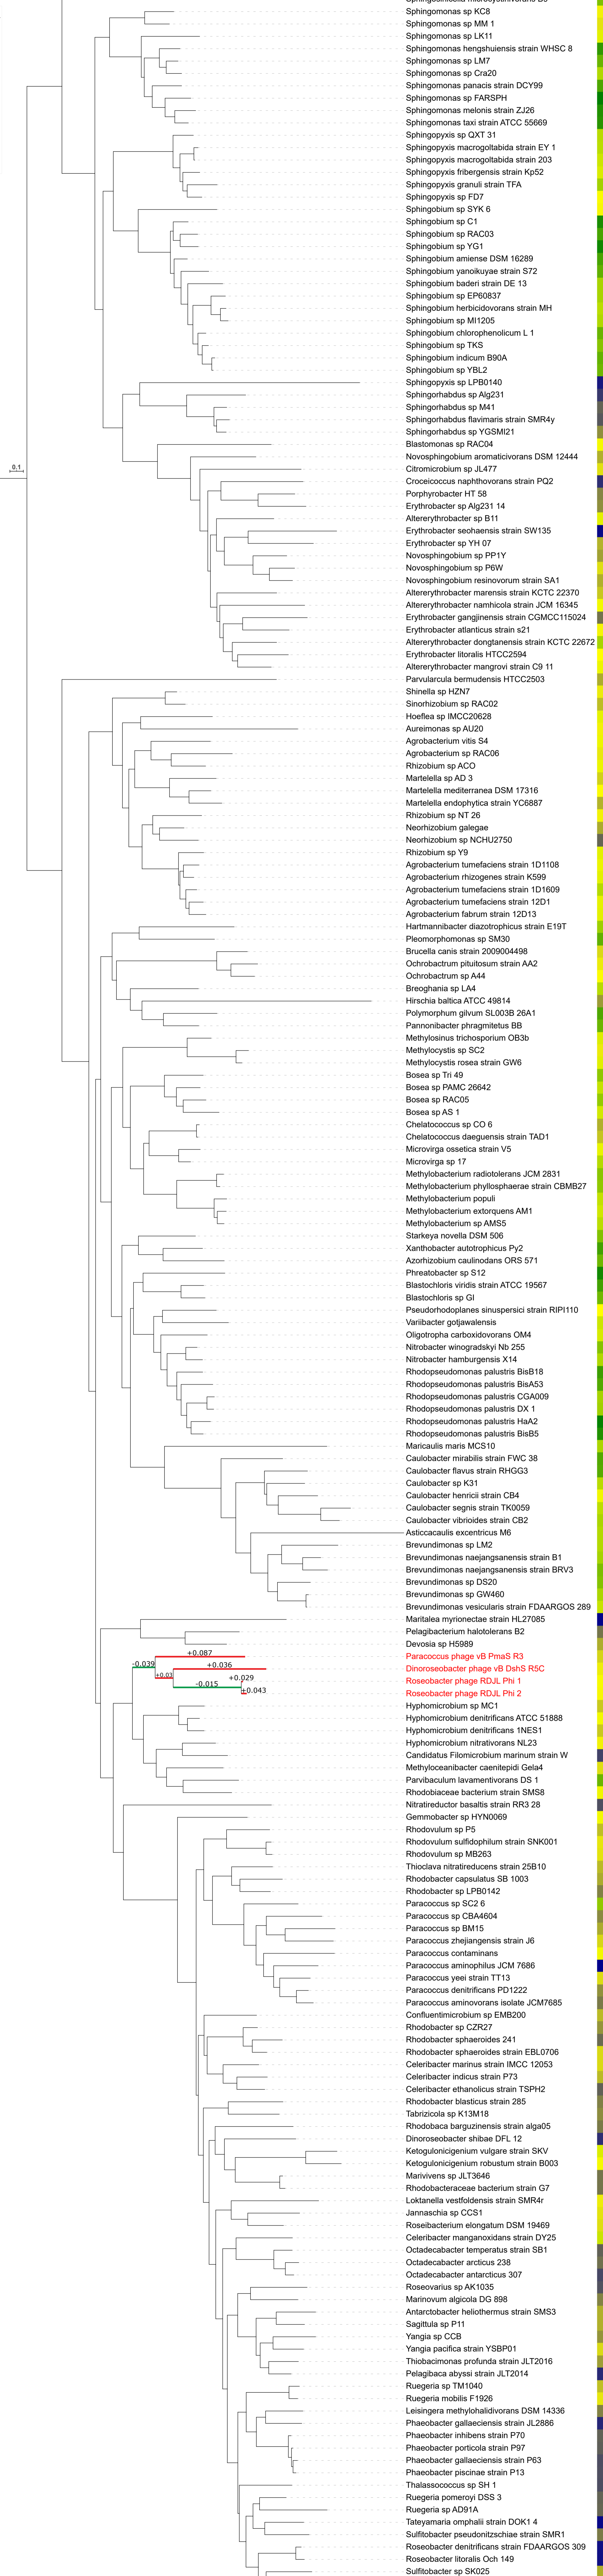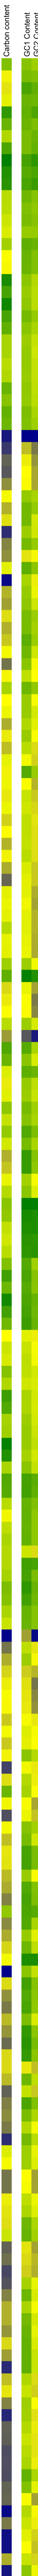

- Sphingosinicella microcystinivorans B9
- Sphingomonas sp KC8
- Sphingomonas sp MM 1
- Sphingomonas sp LK11
- Sphingomonas hengshuiensis strain WHSC 8
- Sphingomonas sp LM7
- Sphingomonas sp Cra20
- Sphingomonas panacis strain DCY99
- Sphingomonas sp FARSPH
- Sphingomonas melonis strain ZJ26
- Sphingomonas taxi strain ATCC 55669
- Sphingopyxis sp QXT 31
- Sphingopyxis macrogoltabida strain EY 1
- Sphingopyxis macrogoltabida strain 203
- Sphingopyxis fribergensis strain Kp52
- Sphingopyxis granulii strain TFA
- Sphingopyxis sp FD7
- Sphingobium sp SYK 6
- Sphingobium sp C1
- Sphingobium sp RAC03
- Sphingobium sp YG1
- Sphingobium amiense DSM 16289
- Sphingobium yanoikuyae strain S72
- Sphingobium baderi strain DE 13
- Sphingobium sp EP60837
- Sphingobium herbicidovorans strain MH
- Sphingobium sp MI1205
- Sphingobium chlorophenicum L 1
- Sphingobium sp TKS
- Sphingobium indicum B90A
- Sphingobium sp YBL2
- Sphingopyxis sp LPB0140
- Sphingorhabdus sp Alg231
- Sphingorhabdus sp M41
- Sphingorhabdus flavimaris strain SMR4y
- Sphingorhabdus sp YGSM121
- Blastomonas sp RAC04
- Novosphingobium aromaticivorans DSM 12444
- Citromicrobium sp JL477
- Croceicoccus naphthovorans strain PQ2
- Porphyrobacter HT 58
- Erythro bacter sp Alg231 14
- Altererythro bacter sp B11
- Erythro bacter seohaensis strain SW135
- Erythro bacter sp YH 07
- Novosphingobium sp PP1Y
- Novosphingobium sp P6W
- Novosphingobium resinovorum strain SA1
- Altererythro bacter marensis strain KCTC 22370
- Altererythro bacter namhicola strain JCM 16345
- Erythro bacter gangjinensis strain CGMCC115024
- Erythro bacter atlanticus strain s21
- Altererythro bacter dongtanensis strain KCTC 22672
- Erythro bacter litoralis HTCC2594
- Altererythro bacter mangrovi strain C9 11
- Parvularcula bermudensis HTCC2503
- Shinella sp HZN7
- Sinorhizobium sp RAC02
- Hoeflea sp IMCC20628
- Aureimonas sp AU20
- Agrobacterium vitis S4
- Agrobacterium sp RAC06
- Rhizobium sp ACO
- Martellella sp AD 3
- Martellella mediterranea DSM 17316
- Martellella endophytica strain YC6887
- Rhizobium sp NT 26
- Neorhizobium galegae
- Neorhizobium sp NCHU2750
- Rhizobium sp Y9
- Agrobacterium tumefaciens strain 1D1108
- Agrobacterium rhizogenes strain K599
- Agrobacterium tumefaciens strain 1D1609
- Agrobacterium tumefaciens strain 12D1
- Agrobacterium fabrum strain 12D13
- Hartmannibacter diazotrophicus strain E19T
- Pleomorphomonas sp SM30
- Brucella canis strain 2009004498
- Ochrobactrum pituitosum strain AA2
- Ochrobactrum sp A44
- Breoghanina sp LA4
- Hirschia baltica ATCC 49814
- Polymorphum gilvum SL003B 26A1
- Pannonibacter phragmitetus BB
- Methylosinus trichosporium OB3b
- Methylocystis sp SC2
- Methylocystis rosea strain GW6
- Bosea sp Tri 49
- Bosea sp PAMC 26642
- Bosea sp RAC05
- Bosea sp AS 1
- Chelatococcus sp CO 6
- Chelatococcus daeguensis strain TAD1
- Microvirga ossetica strain V5
- Microvirga sp 17
- Methylobacterium radiotolerans JCM 2831
- Methylobacterium phyllosphaerae strain CBMB27
- Methylobacterium populi
- Methylobacterium extorquens AM1
- Methylobacterium sp AMS5
- Starkeya novella DSM 506
- Xanthobacter autotrophicus Py2
- Azorhizobium caulinodans ORS 571
- Phreatobacter sp S12
- Blastochloris viridis strain ATCC 19567
- Blastochloris sp GI
- Pseudorhodoplanes sinuspersici strain RPI110
- Variibacter gotjawalensis
- Oligotropha carboxidovorans OM4
- Nitrobacter winogradskyi Nb 255
- Nitrobacter hamburgensis X14
- Rhodopseudomonas palustris BisB18
- Rhodopseudomonas palustris BisA53
- Rhodopseudomonas palustris CGA009
- Rhodopseudomonas palustris DX 1
- Rhodopseudomonas palustris HaA2
- Rhodopseudomonas palustris BisB5
- Maricaulis maris MCS10
- Caulobacter mirabilis strain FWC 38
- Caulobacter flavus strain RHGG3
- Caulobacter sp K31
- Caulobacter henricii strain CB4
- Caulobacter segnis strain TK0059
- Caulobacter vibrioides strain CB2
- Asticcacaulis excentricus M6
- Brevundimonas sp LM2
- Brevundimonas naejangsanensis strain B1
- Brevundimonas naejangsanensis strain BRV3
- Brevundimonas sp DS20
- Brevundimonas sp GW460
- Brevundimonas vesicularis strain FDAARGOS 289
- Maritalea myronectae strain HL27085
- Pelagibacterium halotolerans B2
- Devosia sp H5989
- Paracoccus phage vB PmaS R3
- Dinoroseobacter phage vB DshS R5C
- Roseobacter phage RDJL Phi 1
- Roseobacter phage RDJL Phi 2
- Hyphomicrobium sp MC1
- Hyphomicrobium denitrificans ATCC 51888
- Hyphomicrobium denitrificans 1NES1
- Hyphomicrobium nitrativorans NL23
- Candidatus Filomicrobium marinum strain W
- Methyloceanibacter caenitipidi Gela4
- Parvibaculum lavamentivorans DS 1
- Rhodobiaceae bacterium strain SMS8
- Nitratireductor basaltis strain RR3 28
- Gemmobacter sp HYN0069
- Rhodovulum sp P5
- Rhodovulum sulfidophilum strain SNK001
- Rhodovulum sp MB263
- Thioclava nitratireducens strain 25B10
- Rhodobacter capsulatus SB 1003
- Rhodobacter sp LPB0142
- Paracoccus sp SC2 6
- Paracoccus sp CBA4604
- Paracoccus sp BM15
- Paracoccus zhejiangensis strain J6
- Paracoccus contaminans
- Paracoccus aminophilus JCM 7686
- Paracoccus yeei strain TT13
- Paracoccus denitrificans PD1222
- Paracoccus aminovorans isolate JCM7685
- Confluentimicrobium sp EMB200
- Rhodobacter sp CZR27
- Rhodobacter sphaeroides 241
- Rhodobacter sphaeroides strain EBL0706
- Celeribacter marinus strain IMCC 12053
- Celeribacter indicus strain P73
- Celeribacter ethanolicus strain TSPH2
- Rhodobacter blasticus strain 285
- Tabrizicola sp K13M18
- Rhodobaca barguzinensis strain algo05
- Dinoroseobacter shibae DFL 12
- Ketogulonigenium vulgare strain SKV
- Ketogulonigenium robustum strain B003
- Marivivus sp JLT3646
- Rhodobacteraceae bacterium strain G7
- Loktanelia vestfoldensis strain SMR4r
- Jannaschia sp CCS1
- Roseibacterium elongatum DSM 19469
- Celeribacter manganoxidans strain DY25
- Octadecabacter temperatus strain SB1
- Octadecabacter arcticus 238
- Ocladecabacter antarcticus 307
- Roseovarium sp AK1035
- Marinovium algicola DG 898
- Antarctobacter heliothermus strain SMS3
- Sagittula sp P11
- Yangia sp CCB
- Yangia pacifica strain YSBP01
- Thiobacimonas profunda strain JLT2016
- Pelagibaca abyssii strain JLT2014
- Ruegeria sp TM1040
- Ruegeria mobilis F1926
- Leisingera methylohalidivorans DSM 14336
- Phaeobacter gallaeciensis strain JL2886
- Phaeobacter inhibens strain P70
- Phaeobacter porticola strain P97
- Phaeobacter gallaeciensis strain P63
- Phaeobacter piscinae strain P13
- Thalassococcus sp SH 1
- Ruegeria pomeroyi DSS 3
- Ruegeria sp AD91A
- Tateyamaria omphalii strain DOK1 4
- Sulfobacter pseudonitratificans strain SMR1
- Roseobacter denitrificans chraie FDAARGOS 309
- Roseobacter litoralis Och 149
- Sulfitobacter sp SK025
- Sulfitobacter sp AM1 D1
- Sulfitobacter sp D7

# g14

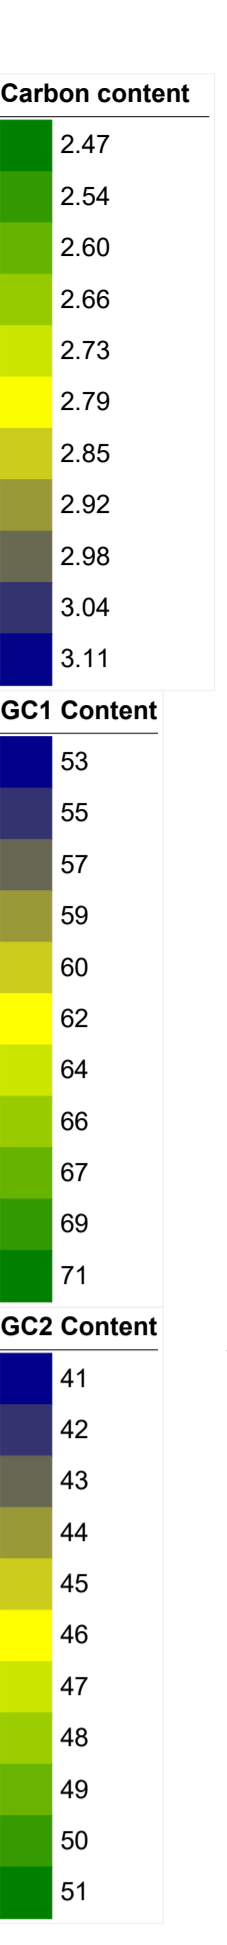

10.1

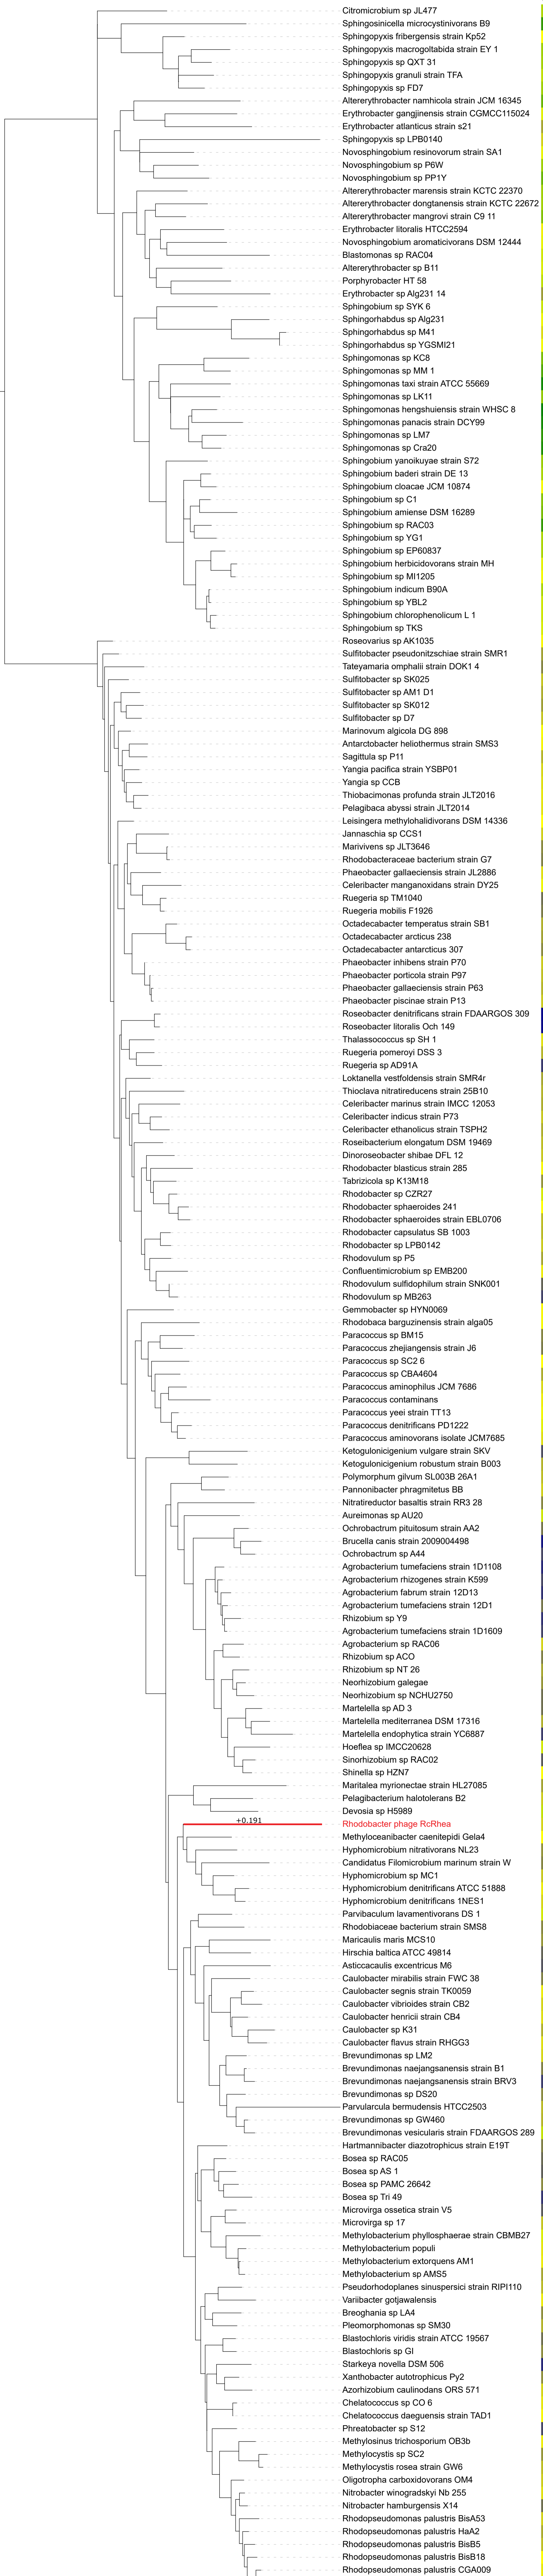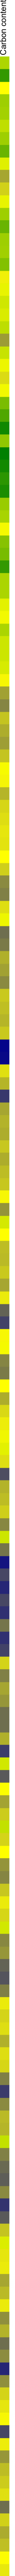

# g15

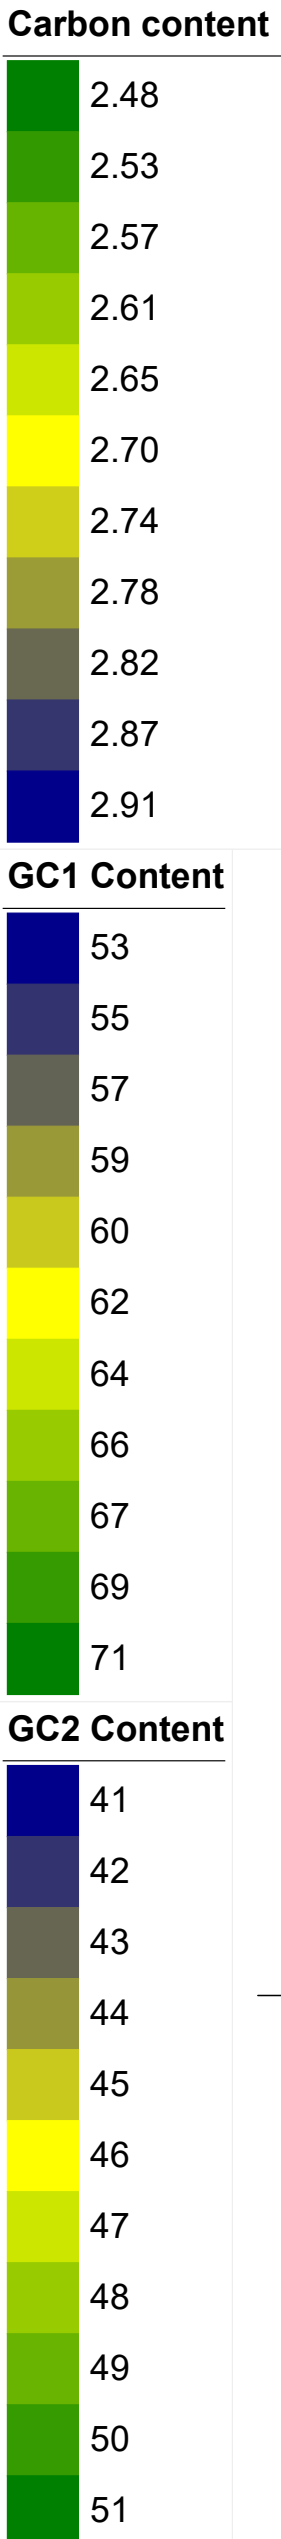

0.1

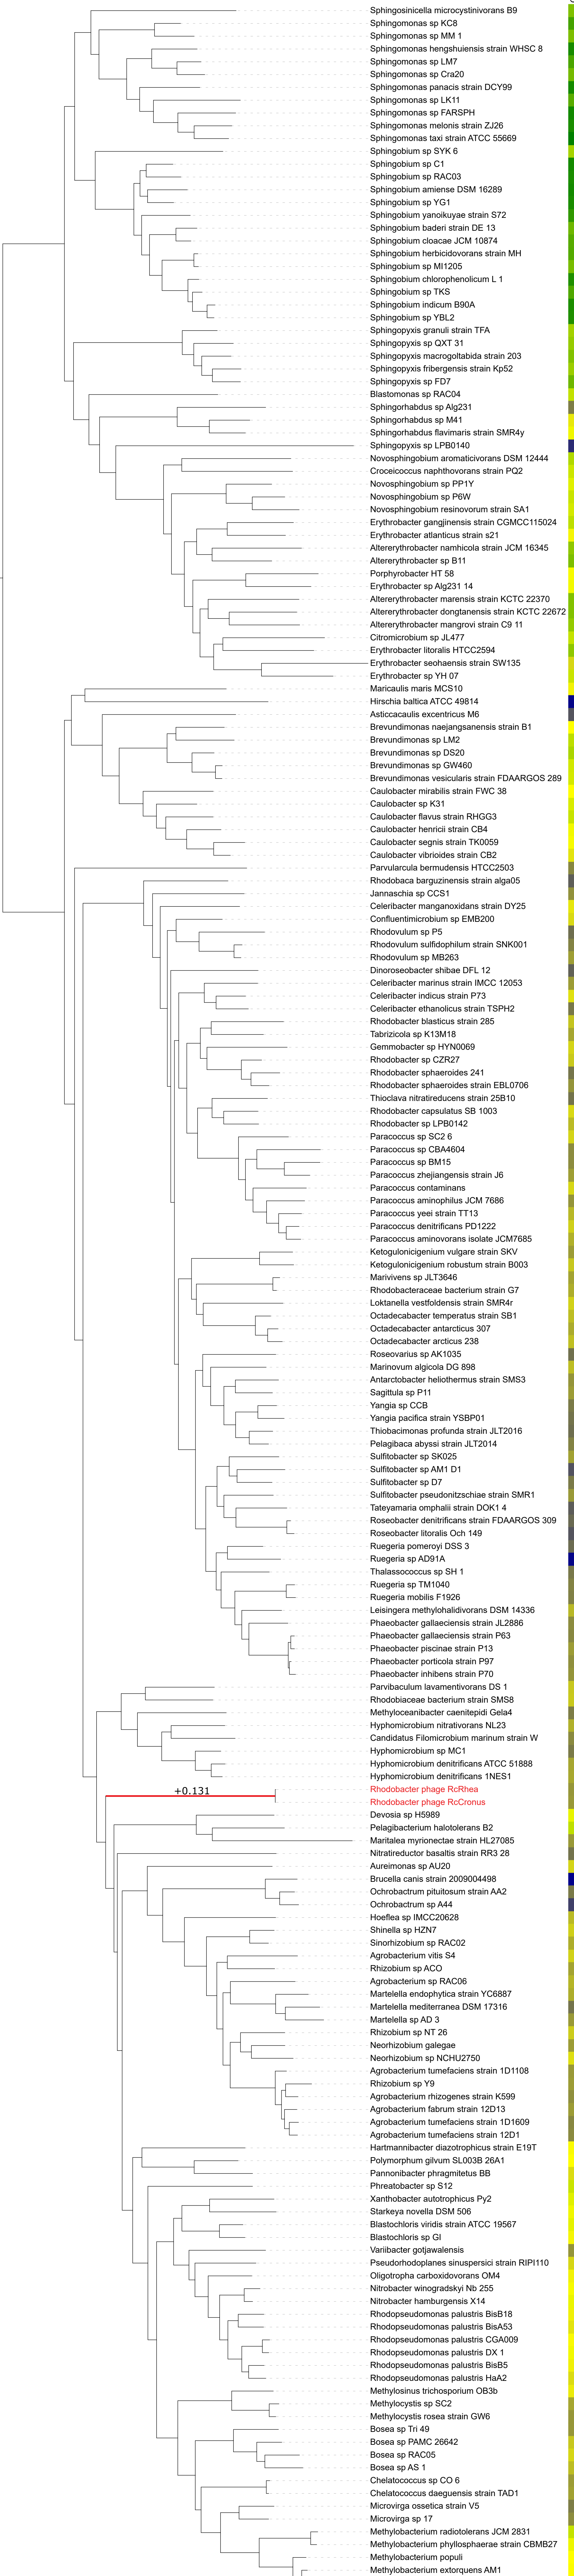

Carbon content

GC1 Content

GC2 Content
