# Supplementary material for: Selection for Reducing Energy Cost of Protein Production Drives the GC Content and Amino Acid Composition Bias in Gene Transfer Agents
Source: PubMed Central journal article supplement (PMC7360931; doi:10.1128/mbio.01206-20), 2020-07-14
Supplement: mBio.01206-20-st001.pdf [file mBio.01206-20-st001.pdf]

**Table S1. The number of GTA genes detected in 212 alphaproteobacterial genomes and viruses from the RefSeq database.**

| <b>GTA gene</b>     | <b>Number of GTA genes</b> | <b>Number of viral homologs</b> | <b>Used for cost of production analysis</b> | <b>Used for ancestral reconstructions</b> | <b>Functional annotation<sup>#</sup></b> |
|---------------------|----------------------------|---------------------------------|---------------------------------------------|-------------------------------------------|------------------------------------------|
| <b><i>g1</i></b>    | 41                         | 0                               |                                             |                                           | hypothetical protein                     |
| <b><i>g2</i></b>    | 205                        | 16                              | X                                           | X                                         | ATP-binding protein                      |
| <b><i>g3</i></b>    | 204                        | 261                             | X                                           | X                                         | phage-portal protein                     |
| <b><i>g3.5</i></b>  | 57                         | 0                               |                                             |                                           | hypothetical protein                     |
| <b><i>g4</i></b>    | 205                        | 164                             | X                                           | X                                         | HK97 family phage prohead protease       |
| <b><i>g5</i></b>    | 205                        | 137                             | X                                           | X                                         | phage major capsid protein               |
| <b><i>g6</i></b>    | 209                        | 36                              | X                                           | X                                         | hypothetical protein                     |
| <b><i>g7</i></b>    | 151                        | 63                              | X                                           | X                                         | head-tail adaptor protein                |
| <b><i>g8</i></b>    | 209                        | 66                              | X                                           | X                                         | DUF3168 domain-containing protein        |
| <b><i>g9</i></b>    | 209                        | 18                              | X                                           | X                                         | phage major tail protein, TP901-1 family |
| <b><i>g10</i></b>   | 208                        | 1                               |                                             | X                                         | gene transfer agent family protein       |
| <b><i>g10.1</i></b> | 203                        | 0                               |                                             |                                           | phage tail assembly chaperone            |
| <b><i>g11</i></b>   | 209                        | 1                               |                                             | X                                         | phage tail tape measure protein          |
| <b><i>g12</i></b>   | 209                        | 26                              | X                                           | X                                         | TIGR02217 family protein                 |
| <b><i>g13</i></b>   | 207                        | 70                              | X                                           | X                                         | DUF2163 domain-containing protein        |
| <b><i>g14</i></b>   | 200                        | 26                              | X                                           | X                                         | peptidase                                |
| <b><i>g15</i></b>   | 200                        | 12                              | X                                           | X                                         | hypothetical protein                     |

<sup>#</sup> Taken from the RefSeq record NC\_014034.1
