# Supplementary material for: Selection for Reducing Energy Cost of Protein Production Drives the GC Content and Amino Acid Composition Bias in Gene Transfer Agents
Source: PubMed Central journal article supplement (PMC7360931; doi:10.1128/mbio.01206-20), 2020-07-14
Supplement: mBio.01206-20-st003.pdf [file mBio.01206-20-st003.pdf]

**Table S3. The likelihood ratio test for the branch site A model.**

| GTA gene                | LRT           | p-value         | Corrected p-value |
|-------------------------|---------------|-----------------|-------------------|
| <i>g2</i> <sup>§</sup>  | <b>52.23</b>  | <b>4.94E-13</b> | <b>6.91E-12</b>   |
| <i>g3</i>               | <b>58.29</b>  | <b>2.26E-14</b> | <b>3.17E-13</b>   |
| <i>g4</i>               | <b>28.52</b>  | <b>9.27E-08</b> | <b>1.30E-06</b>   |
| <i>g5</i>               | <b>33.89</b>  | <b>5.83E-09</b> | <b>8.16E-08</b>   |
| <i>g6</i>               | <b>19.49</b>  | <b>1.01E-05</b> | <b>0.00014112</b> |
| <i>g7</i>               | 11.34         | 0.000759        | 0.0106204         |
| <i>g8</i>               | 1.14          | 0.2857          | 1                 |
| <i>g9</i>               | <b>14.98</b>  | <b>0.000109</b> | <b>0.0015218</b>  |
| <i>g10</i>              | 9.16          | 0.002474        | 0.034636          |
| <i>g11</i>              | 6.09          | 0.01359         | 0.19026           |
| <i>g12</i> <sup>*</sup> | <b>49.76</b>  | <b>1.74E-12</b> | <b>2.43E-11</b>   |
| <i>g13</i>              | <b>51.84</b>  | <b>6.02E-13</b> | <b>8.43E-12</b>   |
| <i>g14</i>              | 5.4           | 0.02014         | 0.28196           |
| <i>g15</i> <sup>*</sup> | <b>153.36</b> | <b>3.20E-35</b> | <b>4.47E-34</b>   |

\*To reduce computation time, for *g12* and *g15* genes the alignments were trimmed by removing sites that had > 50% and >20% gaps, respectively.

§Genes in bold font have corrected p-values < 0.01
